# Supplementary material for: Rapid identification of quarantine invasiveSolanum elaeagnifoliumby real-time, isothermal recombinase polymerase amplification assay
Source: Royal Society of Chemistry journal article supplement (doi:10.1039/c7ra10781a), 2017-01-01
Supplement: c7ra10781a1.pdf [file c7ra10781a1.pdf]

1 **Supporting Information**

2

3 **Rapid identification of quarantine invasive *Solanum elaeagnifolium* by**  
4 **real-time, isothermal recombinase polymerase amplification assay**

5 Rong Lei <sup>a, \*</sup>, Zhengyue Yan <sup>b</sup>, Fan Hu <sup>a</sup>, Shuifang Zhu <sup>a</sup>, Yufen Xiong <sup>a</sup>, Xiaohong Fan<sup>a, \*</sup>

6 (<sup>a</sup> Chinese Academy of Inspection and Quarantine, Beijing, China, 100176; <sup>b</sup> Fang Cheng Gang

7 Entry-Exit Inspection and Quarantine Bureau, Guangxi, 538001)

8 Corresponding author: \*leir@caiq.gov.cn

9

10

11 ***Plant DNA extraction***

12 Total DNA from plant was extracted using plant DNA extraction kit with magnetic beads (Tiangen  
13 Biotech, Beijing, China). A total of 40 mg dry specimen, or 100 mg seeds, or 100 mg fresh plant  
14 leaves were finally ground to powder in liquid nitrogen with a mortar and a pestle. The powder was  
15 transferred into 1.5-mL tube and subjected to extraction of genomic DNA according to the  
16 manufacturer's instructions. Briefly, the powder were vortexed mixed with a mixture of 400  $\mu$ L  
17 lysate buffer (GPM) and 5  $\mu$ L RNase A (10 mg/mL) and incubated for 10 min at 70°C. Lysate was  
18 centrifuged for 4 min at 20,000 $\times$ g. Three hundred microliters of the supernatant was transferred to a  
19 fresh 1.5 mL tube, followed by adding 300  $\mu$ L GHB, 300  $\mu$ L isopropanol and 15  $\mu$ L magnetic  
20 beads suspension, and vortex mixed for 5 min. Tubes were placed on the magnetic frame for 1 min,  
21 and the solution was removed. The magnetic beads were add with 500  $\mu$ L RD solution to wash the  
22 residual proteins. The magnetic beads were washed with 75% ethanol two times, then were put to  
23 dry at 37°C. 50-100 $\mu$ L autoclaved distilled water was added and incubated for 3 min at 65°C to  
24 elute the DNA.

25 ***The first primer screening for the RPA assay***

26 We firstly screened a characteristic conserved voucher Bohs 3204 UT granule-bound starch  
27 synthase (GBSSI) gene region of *S. elaeagnifolium* (AY996412.1) using basic TwistAmp™ basic  
28 kit (Cambridge, UK). Four forward and three reverse primers (Table S1) were designed to amplify  
29 the *S. elaeagnifolium* genomic DNA template. Primers were synthesized by Sangon Biotech

30 (Shanghai, China).

31 RPA reaction was performed in a 50  $\mu\text{L}$  volume according to the manufactures protocol,  
32 respectively. Besides the rehydration buffer, 480 nM primers and 14 mM magnesium acetate were  
33 contained for the basic RPA reaction. To select the optimized primers, all reagents except for the  
34 primers and magnesium acetate were prepared in a master mix; for the assay of sample, all reagents  
35 except for the template and magnesium acetate were prepared in a master mix. The master mix was  
36 distributed into each 0.2 ml reaction tube containing a dried enzyme pellet. After the addition of the  
37 primers or template, the solution was vortexed briefly and spun down, subsequently magnesium  
38 acetate was pipetted into the tube lids, the lids were closed carefully, and magnesium acetate was  
39 centrifuged into the rehydration buffer using a minispin centrifuge. The sample was vortexed briefly  
40 and spun down. The tubes were immediately placed in an incubator at 39°C for 20-60 min.

41 The amplicon in the reaction tube was purified using Beckman Agencourt AMPure XP beads.  
42 Briefly, add 80  $\mu\text{L}$  beads buffer into the 50  $\mu\text{L}$  reaction tube, mix and stand for 8 min in room  
43 temperature. Then the tube was separated with a magnet, and the supernatant was removed. Wash  
44 the beads with 200  $\mu\text{L}$  of 70% ethanol for twice. When washing, turn the tube on the magnet shelf  
45 for 30 s, then remove the solution with pipette, dry the beads at 37°C. Subsequently, add 30  $\mu\text{L}$  of  
46  $\text{DiH}_2\text{O}$  into the tube, vortex 3 s, stand for 5 min, then put the tube on the magnet shelf for 30 s, then  
47 transfer the solution to a clean tube. Ten microliter of amplicon were detected by 1% agarose gel  
48 electrophoresis.

49 The gel electrophoresis photo of the RPA amplicons of *S. elaeagnifolium* showed that the

50 combination of Elae-BF1/BR1, Elae-BF2/BR1, Elae-BF3/BR1 and Elae-BF4/BR1 can produce  
 51 amplicates (Fig. S1). The further amplification resulted from primer BF2/BR1 and BF3/BR1 showed  
 52 that BF2/BR1 amplified only *S. elaeagnifolium*, but not *S. rostratum*, *S. carolinense*, or *S. torvum*  
 53 (Fig. S2).

54 Table S1. Sequence of primers for the construction of basic-RPA assays.

| Name            | Sequences 5'-3'                     | Position in GBSSI<br>gene sequence<br>(AY996412.1) |
|-----------------|-------------------------------------|----------------------------------------------------|
| <b>Elae-BF1</b> | AGCTTGTTCTGTCAAGTAAGTTACTAGCTGTATGG | 388                                                |
| <b>Elae-BF2</b> | ACTAGCTGTATGGTTGTCTTGACTTAATGTGGC   | 410                                                |
| <b>Elae-BF3</b> | ATTCAGCTTGTTCTGTCAAGTAAGTTACTAGCTG  | 383                                                |
| <b>Elae-BF4</b> | CAAGTAAGTTACTAGCTGTATGGTTGTCTTG     | 400                                                |
| <b>Elae-BR1</b> | ATTGCCAAGGAGATTTCTGAAACTGGGATGT     | 597                                                |
| <b>Elae-BR2</b> | CTTCTCCTGCAAAATAAAGATGATTACCTACAAGG | 642                                                |
| <b>Elae-BR3</b> | CAATGAAGAGAACATCTTCTCCTGCAAAATAAAG  | 657                                                |

55

56 ***The second primer and probe screening for the RPA assay***

57 Then three forward primers (exo-F), four reverse primers (exo-R), and probe (Elae-P) (Fig. S3)  
 58 were designed based on the sequence of the specific amplicons of *S. elaeagnifolium*, in order to  
 59 select the combination producing the highest analytical sensitivity for the *S. elaeagnifolium*. Primers  
 60 and the probes were synthesized by Sangon Biotech (Shanghai, China).

61 ***The primers screening for the real-time PCR assay***

62 The primers were designed across the whole GBSSI gene sequence (AY996412.1), and were listed  
63 in Table S2. To investigate whether the amplification curves were resulted by specific amplification  
64 or non-specific amplification, the melting curves of the four primers for *S. elaeagnifolium* (Fig. S4,  
65 A) showed that primer 3 produced the best single peak.

66 Table S2. Sequence of primers for the construction of real-time PCR assays

| Primer No. | Name       | Sequences 5'-3'            | Position in GBSSI gene sequence (AY996412.1) |
|------------|------------|----------------------------|----------------------------------------------|
| 1          | E-rtPCR-F1 | CTCATAACCGCAGATGATACAA     | 34                                           |
|            | E-rtPCR-R1 | TGCCAATAAAGTAGGGATCACAT    | 97                                           |
| 2          | E-rtPCR-F2 | TAAATTTACATTGCCTCCAGGTC    | 807                                          |
|            | E-rtPCR-R2 | TGAGAAGAGGGAAAGTCAGAGAAAGT | 894                                          |
| 3          | E-rtPCR-F3 | CCTACCAAGGCCGATTTAC        | 853                                          |
|            | E-rtPCR-R3 | GATCTGATTTGAAGCATTAGATTTTC | 966                                          |
| 4          | E-rtPCR-F4 | GAAATCTAATGCTTCAAATCAGATC  | 942                                          |
|            | E-rtPCR-R4 | TTAGCAGATGCTGAGGTCAGAA     | 1298                                         |

67 ***The validation of time-dependent S. elaeagnifolium RPA assays***

68 The real-time fluorescence intensity showed that the fluorescence signal went up at about 6 min,  
69 and to a stage at about 20 min. To check if the fluorescence signal is related to amplification degree,  
70 we used basic RPA kit to amplify the genomic DNA template and adopted agarose gel  
71 electrophoresis to check the amount of amplicons (Fig.S5). The results showed that 10 minutes  
72 amplification could produce enough amplicons to be measured by gel electrophoresis, and 20  
73 minutes longer amplification didn't increase the amplicon obviously.

74 **Supplementary Figure legends**

75 **Fig. S1.** Gel electrophoresis photo of the RPA amplicons of *S. elaeagnifolium*. M, 100 bp DNA Marker; For *S.*  
76 *elaegnifolium*, lane 11, 12, 13, 21, 22, 23, 31, 32, 33, 41, 42, 43 means the combination of primers Elae-  
77 BF1/BR1, BF1/BR2, BF1/BR3, BF2/BR1, BF2/BR2, BF3/BR3, BF4/BR1, BF4/BR2, BF4/BR3, respectively.  
78 The sequences of the primers were listed in Table S1.

79 **Fig. S2.** The gel electrophoresis of basic RPA amplicons of different DNA template with BF2/BR1 (lane 1-4) or  
80 BF3/BR1 (lane 5-8) primers. Lane 1,5: *S. rostratum*; Lane 2,6: *S. carolinense*; Lane 3,7: *S. torvum*; Lane 4,8: *S.*  
81 *elaegnifolium*, respectively. M: 100 bp DNA Marker.

82 **Fig. S3.** Real-time RPA primers and probes sequence aligned with the *S. elaeagnifolium* amplicon; Elae-P:  
83 fluorescence probe for real-time RPA.

84 **Fig. S4. A.** Fluorescent amplification curves of *S. elaeagnifolium* (E), *S. rostratum* (R), *S. torvum* (T), *S. nigrum* L  
85 (N) and water (W) using different primers listed (A. primer 1; B, primer 2; C, primer 3; D. primer 4) in Table S2.  
86 E: *S. elaeagnifolium*; R: *S. rostratum*; C: *S. carolinense*; T: *S. torvum*; N: *S. nigrum* L; W: water.

87 **Fig. S5. A.** Melting curves of real-time PCR assay of *S. elaeagnifolium* genomic DNA using primer 1 (curve 1),  
88 primer 2 (curve 2), primer 3 (curve 3) and primer 4 (curve 4). **B.** Melting curves of real-time PCR assay of *S.*  
89 *elaegnifolium* (E), *S. rostratum* (R), *S. torvum* (T), *S. nigrum* L (N) and water (W).

90 **Fig. S6.** The amplicon produced from different RPA amplification time. Lane 1, 10 min; Lane 2, 20 min; Lane 3,  
91 30 min; Lane 4, 40 min; Lane 5, 60 min; Lane 6, 90 min; M, 100 bp DNA Marker.

92

93

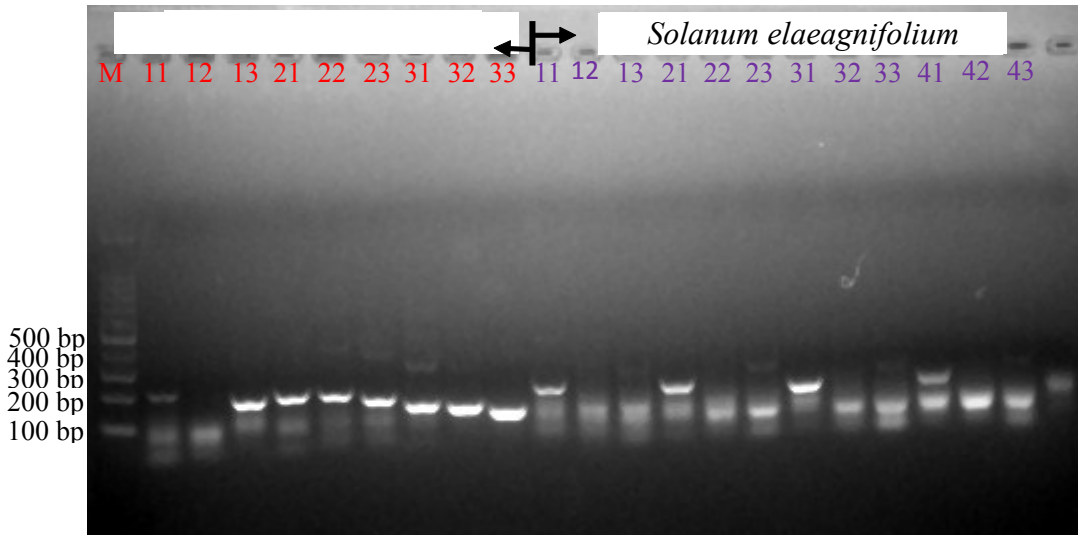

95

96 **Fig. S1.** 1.0% agarose gel electrophoresis with 1×TAE buffer to separate the RPA amplicons of *S. elaeagnifolium*.  
 97 M, 100 bp DNA Marker; For *S. elaeagnifolium*, lane 11, 12, 13, 21, 22, 23, 31, 32, 33, 41, 42, 43 means the  
 98 combination of primers Elae-BF1/BR1, BF1/BR2, BF1/BR3, BF2/BR1, BF2/BR2, BF3/BR3, BF4/BR1,  
 99 BF4/BR2, BF4/BR3, respectively. The sequences of the primers were listed in Table S1.

100

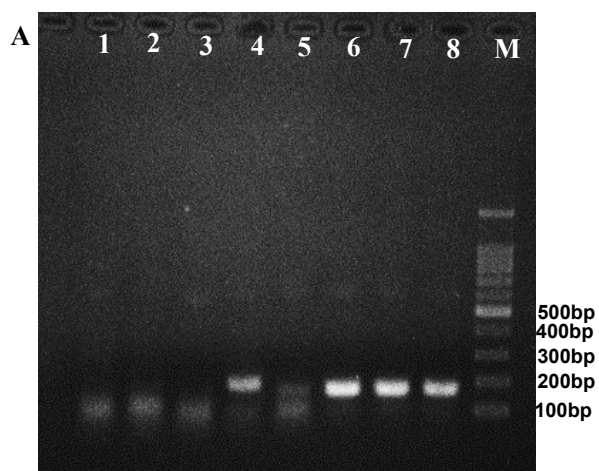

101

102 **Fig. S2.** 1.0% agarose gel electrophoresis with 1×TAE buffer to separate of basic RPA amplicons of different  
103 DNA template with BF2/BR1 (lane 1-4) or BF3/BR1 (lane 5-8) primers. Lane 1,5: *S. rostratum*; Lane 2,6: *S.*  
104 *carolinense*; Lane 3,7: *S. torvum*; Lane 4,8: *S. elaeagnifolium*, respectively. M: 100 bp DNA Marker.



|            | 400                                                                                                                                                                                                             | 410 | 420 | 430 | 440 | 450 | 460 | 470 | 480 | 490 | 500 | 510 | 520 | 530 | 540 | 550 | 560 | 570 | 580                                           | 590 |  |
|------------|-----------------------------------------------------------------------------------------------------------------------------------------------------------------------------------------------------------------|-----|-----|-----|-----|-----|-----|-----|-----|-----|-----|-----|-----|-----|-----|-----|-----|-----|-----------------------------------------------|-----|--|
| Amplicon   | TTCTGTCAAGTAAGTTACTAGCTGTATGGTTGCTTTGACTTAATGTGGCATTCTACTTTTGTCTTTAATCCTTTTTTTAACCTTGTTTTCTTTGTCACCTCTCAGGCAGCCCTAGAGGCACCCAGAGTTCTGAATTTGAACTGCAGCAAATACCTCTCAGGACCATATGGTAACACATCCCAGTTTCAGAAATCTCCTTGGCAATCA |     |     |     |     |     |     |     |     |     |     |     |     |     |     |     |     |     |                                               |     |  |
| Elae-BF2   | .....ACTAGCTGTATGGTTGCTTTGACTTAATGTGGC.....                                                                                                                                                                     |     |     |     |     |     |     |     |     |     |     |     |     |     |     |     |     |     |                                               |     |  |
| Elae-BR1   |                                                                                                                                                                                                                 |     |     |     |     |     |     |     |     |     |     |     |     |     |     |     |     |     | .....ACATCCCAGTTTCAGAAATCTCCTTGGCAAT..        |     |  |
| Elae-exoF1 | TTCTGTCAAGTAAGTTACTAGCTGTATGGTTGTC.....                                                                                                                                                                         |     |     |     |     |     |     |     |     |     |     |     |     |     |     |     |     |     |                                               |     |  |
| Elae-exoF2 | TTCTGTCAAGTAAGTTACTAGCTGTATGGTTG.....                                                                                                                                                                           |     |     |     |     |     |     |     |     |     |     |     |     |     |     |     |     |     |                                               |     |  |
| Elae-exoF3 | .....ACTAGCTGTATGGTTGCTTTGACTTAATGTG.....                                                                                                                                                                       |     |     |     |     |     |     |     |     |     |     |     |     |     |     |     |     |     |                                               |     |  |
| Elae-exoR1 |                                                                                                                                                                                                                 |     |     |     |     |     |     |     |     |     |     |     |     |     |     |     |     |     | .....TGTTTTCTTTGTCACCTCTCAGGCAGCCCTAGAGG..... |     |  |
| Elae-exoR2 |                                                                                                                                                                                                                 |     |     |     |     |     |     |     |     |     |     |     |     |     |     |     |     |     | .....GGCAGCCCTAGAGGCACCCAGAGTTCTGAATTTG.....  |     |  |
| Elae-exoR3 |                                                                                                                                                                                                                 |     |     |     |     |     |     |     |     |     |     |     |     |     |     |     |     |     | .....CTGCAGCAAATACCTCTCAGGACCATATGG.....      |     |  |
| Elae-exoR4 |                                                                                                                                                                                                                 |     |     |     |     |     |     |     |     |     |     |     |     |     |     |     |     |     | .....GGTAACACATCCCAGTTTCAGAAATCTCCTTGG.....   |     |  |
| Elae-P     | .....ACTAGCTGTATGGTTGCTTTGACTTAATGTGNCATTTACTTTTGTG.....                                                                                                                                                        |     |     |     |     |     |     |     |     |     |     |     |     |     |     |     |     |     |                                               |     |  |

105 **Fig. S3.** Real-time RPA primers and probes sequence aligned with the *S. elaeagnifolium* amplicon; Elaе-P: fluorescence probe for real-time RPA

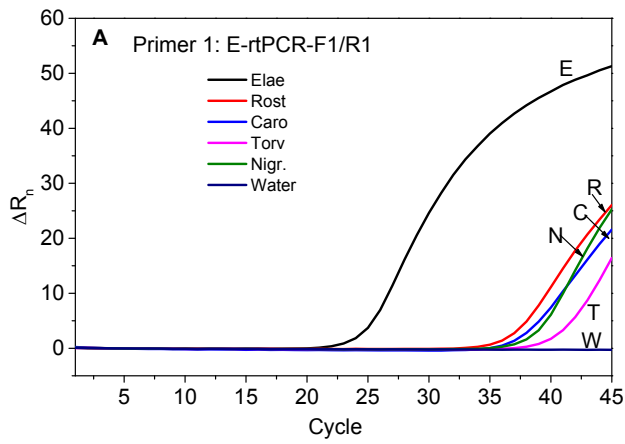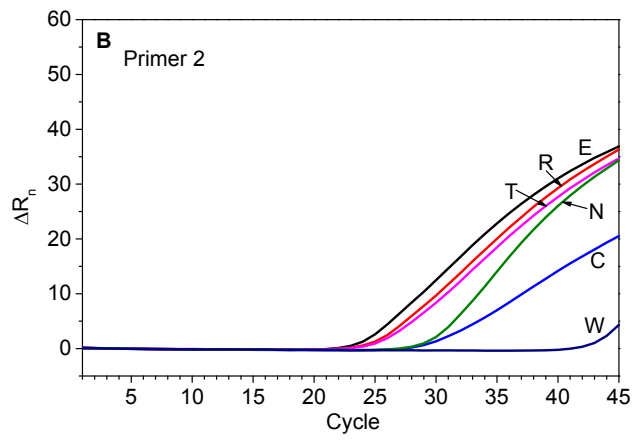

106

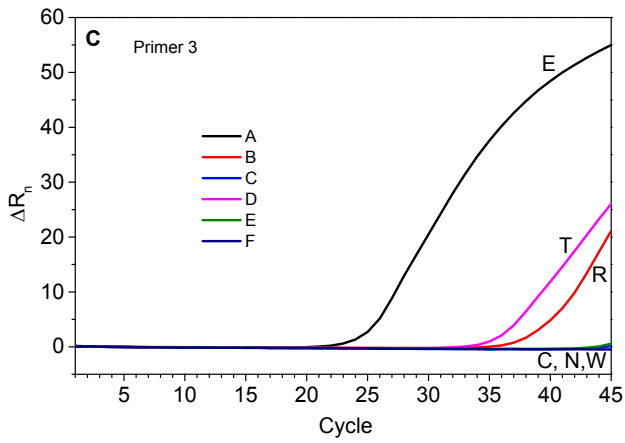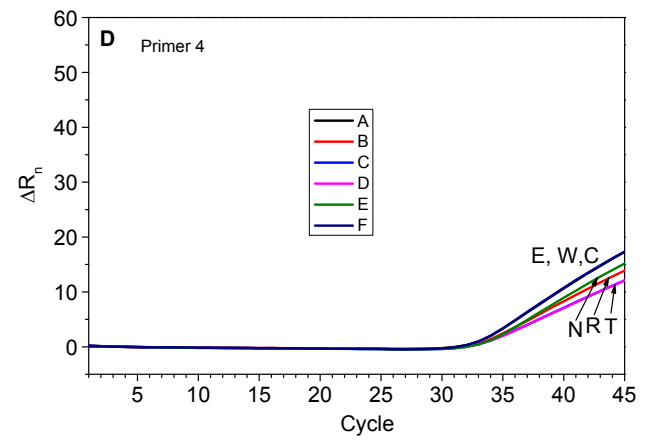

107

108 **Fig. S4.** Fluorescent amplification curves of *S. elaeagnifolium* (E), *S. rostratum* (R), *S. torvum* (T), *S. nigrum* L  
 109 (N) and water (W) using different primers listed (A. primer 1; B, primer 2; C, primer 3; D. primer 4) in Table S2.  
 110 E: *S. elaeagnifolium*; R: *S. rostratum*; C: *S. carolinense*; T: *S. torvum*; N: *S. nigrum* L; W: water.

111

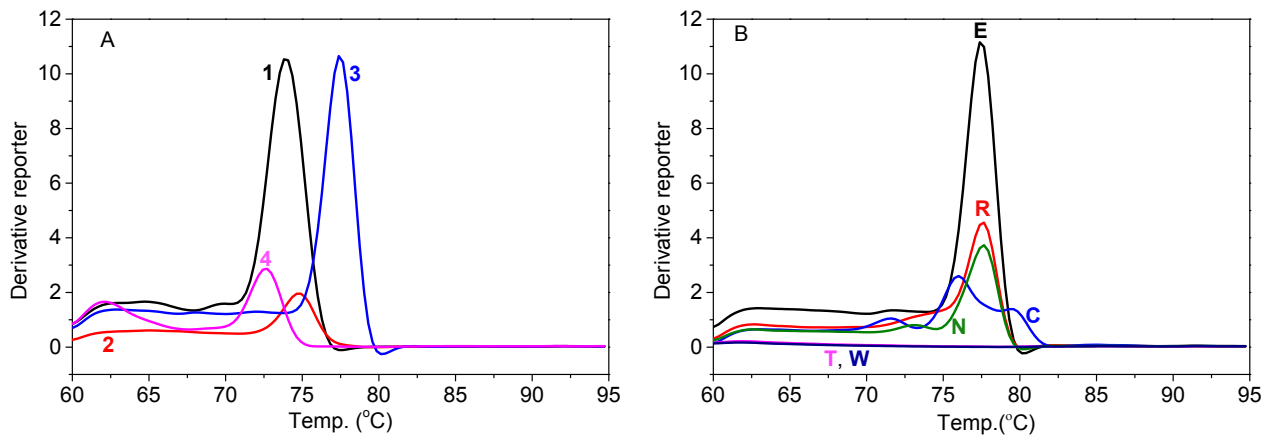

112

113 **Fig. S5. A.** Melting curves of real-time PCR assay of *S. elaeagnifolium* genomic DNA using primer 1 (curve 1),  
114 primer 2 (curve 2), primer 3 (curve 3) and primer 4 (curve 4). **B.** Melting curves of real-time PCR assay of *S.*  
115 *elaegnifolium* (E), *S. rostratum* (R), *S. torvum* (T), *S. nigrum* L (N) and water (W).

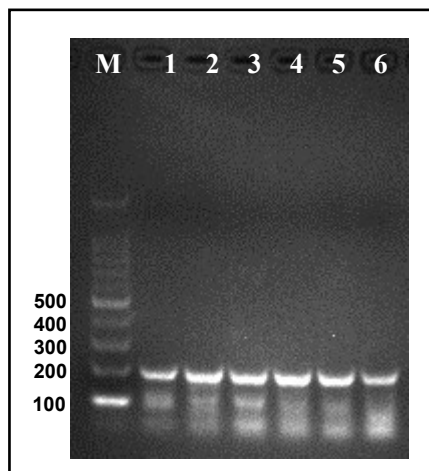

116

117 **Fig. S6.** 1.0 % agarose gel electrophoresis with 1×TAE buffer to separate the amplicon produced from different  
118 RPA amplification time. Lane 1, 10 min; Lane 2, 20 min; Lane 3, 30 min; Lane 4, 40 min; Lane 5, 60 min; Lane  
119 6, 90 min; M, 100 bp DNA Marker.
